# Supplementary material for: Finding building water quality challenges in a 7 year old green school: implications for building design, sampling, and remediation
Source: Royal Society of Chemistry journal article supplement (doi:10.1039/d0ew00520g), 2020-01-01
Supplement: d0ew00520g1.pdf [file d0ew00520g1.pdf]

## SUPPLEMENTARY INFORMATION

### **Finding Building Water Quality Challenges in a 7-Year Old Green School: Implications for Building Design, Sampling, and Remediation**

*Kyungyeon Ra<sup>1</sup>, Tolu Odimayomi<sup>2</sup>, Christian Ley<sup>3</sup>, Tiong Gim Aw<sup>4</sup>, Joan B. Rose<sup>5</sup>, Andrew J. Whelton<sup>6\*</sup>*

1. Purdue University, Lyles School of Civil Engineering, West Lafayette, IN USA: Email: [kra@purdue.edu](mailto:kra@purdue.edu); Telephone: (765) 496-1905
2. Purdue University, Division of Environmental and Ecological Engineering, West Lafayette, IN USA: Email: [todimayo@purdue.edu](mailto:todimayo@purdue.edu); Telephone: (765) 496-7299
3. Purdue University, Division of Environmental and Ecological Engineering, West Lafayette, IN USA: Email: [ley1@purdue.edu](mailto:ley1@purdue.edu); Telephone: (765) 496-7299
4. Tulane University, Department of Environmental Health Sciences, School of Public Health and Tropical Medicine, New Orleans, LA USA: Email: [taw@tulane.edu](mailto:taw@tulane.edu); Telephone: (504) 988-9926
5. Michigan State University, College of Agriculture and Natural Resources, Michigan, MI USA: Email: [rosejo@msu.edu](mailto:rosejo@msu.edu)
6. Purdue University, Lyles School of Civil Engineering, Division of Environmental and Ecological Engineering, West Lafayette, IN USA 47907: Email: [awhelton@purdue.edu](mailto:awhelton@purdue.edu); Telephone: (765) 494-2160

\*Corresponding Author: Purdue University, Lyles School of Civil Engineering, Division of Environmental and Ecological Engineering, West Lafayette, IN USA 47907: Email: [awhelton@purdue.edu](mailto:awhelton@purdue.edu); Telephone: (765) 494-2160

|                                                        |          |
|--------------------------------------------------------|----------|
| <b>1. Materials and methods</b>                        | <b>3</b> |
| 1.1 Water Quality Analysis                             | 4        |
| 1.1.1 Onsite Water Quality Analysis                    | 4        |
| 1.1.2 TOC and DOC Quantifications                      | 4        |
| 1.1.3 Total and Dissolved Heavy Metals Quantifications | 4        |
| 1.1.4 Ion Chromatography                               | 4        |
| 1.1.5 TTHM Analysis                                    | 4        |
| 1.1.6 HPC Analysis                                     | 5        |
| 1.1.7 TCC Analysis                                     | 5        |
| 1.1.8 Nitrification/Denitrification Analysis           | 5        |
| <b>2. Results and discussion</b>                       | <b>6</b> |
| 2.1 Other Heavy Metals Found and Water Corrosivity     | 10       |
| 2.2 Other Contaminants                                 | 11       |
| 2.3 Water Temperature Monitoring                       | 12       |

## Tables and Figures

Figure SI-1. School water usage for last four years

Figure SI-2. Location of the water sample collection outside the school campus

Table SI-1. A comparison of water quality entering the building to the public water supplier's annual report

Table SI-2. 2018 Total water use at the school campus

Figure SI-3. Alkalinity concentration as  $\text{CaCO}_3$  at routine sampling locations

Figure SI-4. Copper concentration of multiple grabs from routine sampling locations

Figure SI-5. Total organic carbon concentration of first draw water samples

Figure SI-6. Total cell count concentration at routine sampling locations

Table SI-3. Water quality test results for water sampling outside the school campus

Table SI-4. Other heavy metal water sampling results from the school

Figure SI-7. Total trihalomethane concentration at routine water sampling locations

Figure SI-8. Temperature washout curves for hot water.

Table SI-5. Estimated delivery and return pipe length for the water temperature monitoring

## 1. Materials and methods

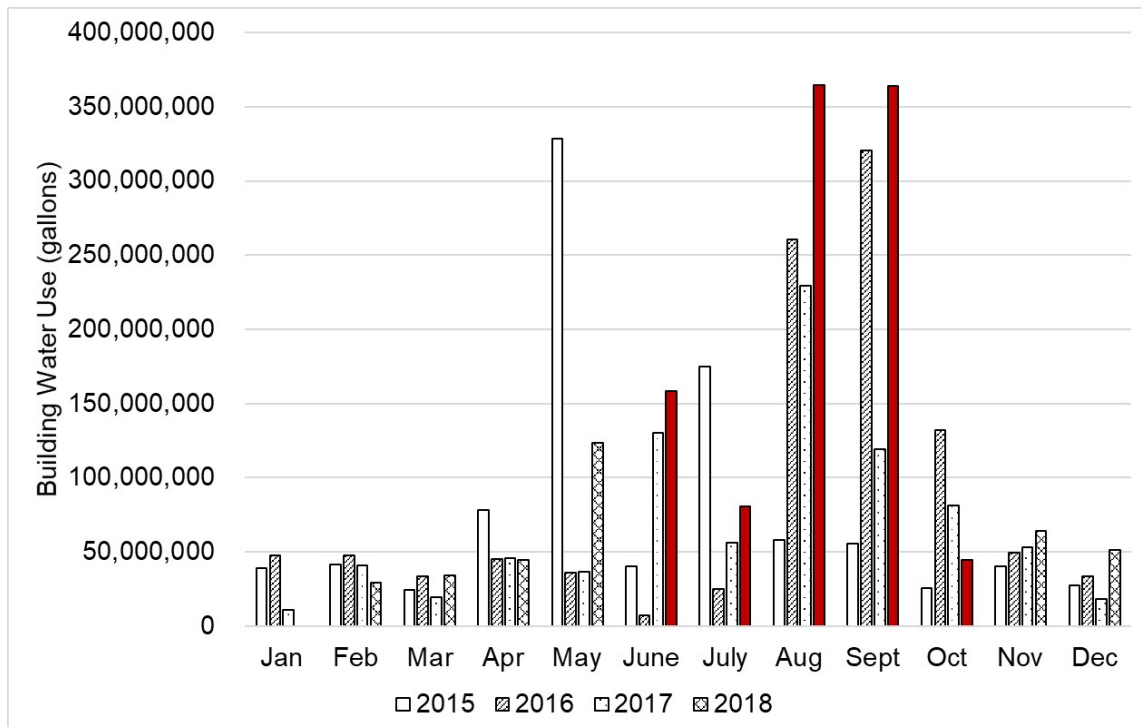

**Figure SI-1. School water usage for last four years.** Red colored bars are when the water sampling event was conducted (June 22, July 20, July 27, August 3, September 7, October 12).

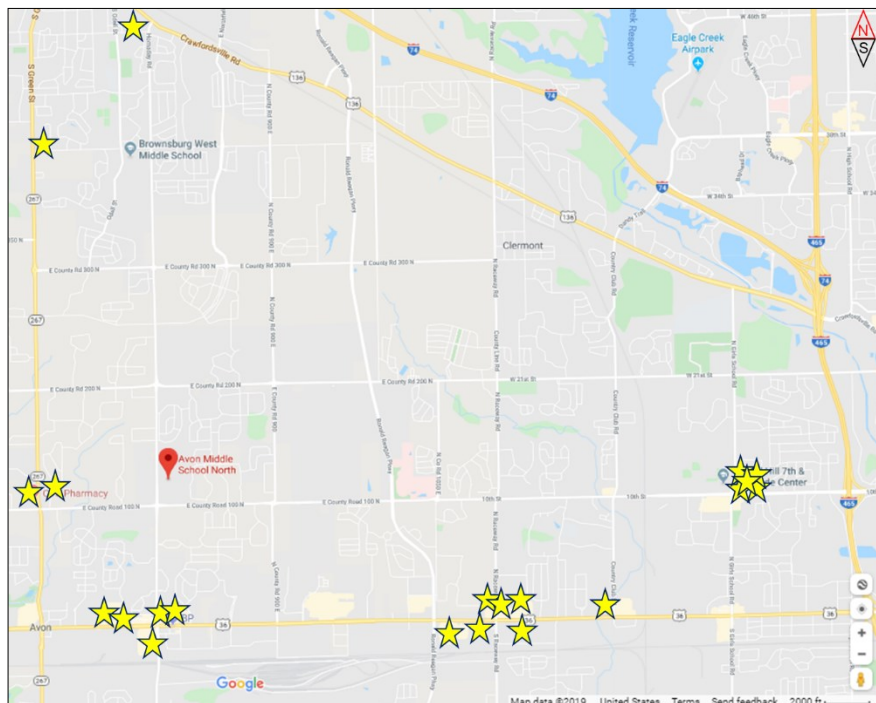

**Figure SI-2. Location of water sample collection outside the school campus.** Yellow stars indicate the approximate location of the commercial building water samples (21 locations). Scale and compass are on the right corner.

## 1.1 Water Quality Analysis

### 1.1.1 Onsite Water Quality Analysis

Total chlorine, free chlorine, monochloramine and free ammonia were analyzed onsite using HACH® 131 pocket colorimeter (DPD method). Water pH, DO, and temperature was measured using an Orion Star A329 portable pH meter (Thermo Scientific). Method detection limit (MDL) for total chlorine was 0.05 mg/L, free ammonia was 0.02 mg/L, and monochloramine was 0.04 mg/L.

### 1.1.2 TOC and DOC Quantifications

A Shimadzu TOC-L CPH/CPN was used to analyze TOC and DOC concentration. To get DOC samples, 50 mL of water sample was filtered through 0.5 µm glass fiber filter. The instrument was calibrated at 0.25 mg/L, 0.5 mg/L, 1 mg/L, 2 mg/L, 5 mg/L, 10 mg/L, and 50 mg/L TOC using  $\text{HOOC}\text{C}_6\text{H}_4\text{COOK}$  ( $r^2 > 0.99$ ).

### 1.1.3 Total and Dissolved Heavy Metals Quantifications

To get dissolved metal samples, 30 mL of water sample was filtered through 0.45 µm nylon filter. Total and dissolved metal samples were analyzed by iCAP 7400 Duo ICP-OES (Thermo Scientific), and autosampler ASX-280 (CETAC Teledyne). Mixture of metals including Al, As, Be, Cd, Co, Cr, Cu, Fe, Hg, Mn, Ni, Pb, Se, and Zn was analyzed. The instrument was calibrated at 1 µg/L, 2 µg/L, 5 µg/L, 10 µg/L, 25 µg/L, 50 µg/L, 100 µg/L and 250 µg/L ( $r^2 > 0.99$ ).

### 1.1.4 Ion Chromatography

An Metrohm 940 Professional IC Vario with a 850 Professional Sample Processor was used to analyze ion chromatography. The anions including bromide, chloride, fluoride, nitrate, nitrite, phosphate, and sulfate, and the cations including ammonium, calcium, lithium, magnesium, potassium, and sodium were analyzed. A mixture of 3.2mM sodium carbonate and 1mM sodium bicarbonate was used for the anion eluent, and a 3.5mM oxalic acid was used for the cation eluent. Custom anion mix 3 (Metrohm Cat No. REAIC1230), and custom cation mix 2 (Metrohm Cat no. REAIC1035) were used. The instrument was calibrated at 0.2 mg/L to 100 mg/L ( $r^2 > 0.99$ ).

### 1.1.5 TTHM Analysis

An Agilent Technologies 7890B Gas Chromatography was used to analyze TTHMs. From collected water samples, only 5 mL water sample was transferred to headspace vials to extract TTHMs. 1 mL sample extracted by sampler was heated in an agitator for 15 min at 80°C. Then the gas phase sample was injected to 1:10 to 1:50 split ration column for analysis. The program was set for 5 min at 40°C, ramped to 240°C at 20°C/min, and then held at 240°C for 5 min. The analytical standard mix including  $\text{CHCl}_3$ ,  $\text{CHBrCl}_2$ ,  $\text{CHBr}_2\text{Cl}$ , and  $\text{CHBr}_3$

purchased from Supelco™ was used.

#### 1.1.6 HPC Analysis

The water samples in the field were collected in 1L HDPE bottles and transferred to the laboratory. Sterilized water was filtered first using a PALL® 47mm magnetic filter funnels, and Advantec® sterilized MCE filters with pore size 0.45 µm was used. Each sample was filtered at least 300 mL volume three times, and filters were placed on agar plates. Agar plates were incubated at 35°C for 48 hours before colonies were counted.

#### 1.1.7 TCC Analysis

FCM analysis was conducted to quantify the total number of microbial cells in each water sample using SYBR Green I dye which binds specifically to nucleic acid (Swiss Research method 366.1). Each water sample was stained 1:100 with SYBR-Green I nucleic acid gel stain diluted in filtered dimethylsulfoxide (DMSO). The samples were incubated in a 96-well plate in the dark at 37°C for 13 minutes. Triplicate samples from each fixture were analyzed using FCM (CytoFLEX, Beckman-Coulter Inc., Brea, CA, USA). A constant and uniform gating strategy was applied to all samples.

#### 1.1.8 Nitrification/Denitrification Analysis

Nitrifying and denitrifying bacteria were measured using BART™ test. For both tests, water samples were collected in the provided tubes. For nitrification, the cap was replaced with a reactor cap after 5 days. Reaction was observed after the tube was rest for 3 hours. For denitrification, tubes were incubated at room temperature for 4 days to observe any bacteria growth each day.

## 2. Results and discussion

**Table SI-1. A comparison of water quality entering the building to the public water supplier's annual report**

| Measurement                   | Drinking water standard      | 2018 system range reported by the public water supplier | School sampling results from June - October |
|-------------------------------|------------------------------|---------------------------------------------------------|---------------------------------------------|
| pH                            | 6.5 – 8.5                    | 7.00 – 8.48                                             | 7.62 – 7.87                                 |
| Chlorine as Cl <sub>2</sub>   | 4 ppm                        | 0.02 – 2.9 ppm                                          | BDL – 0.43 ppm                              |
| <i>E. coli</i>                | 1                            | 0                                                       | -                                           |
| Giardia (org/10L)             | 0 org/10L                    | ND                                                      | -                                           |
| Hardness (ppm)                | -                            | 138 – 453 ppm                                           | 286 – 358 ppm                               |
| Total Coliforms               | -                            | 0 – 2.4%                                                | -                                           |
| Turbidity                     | -                            | 0.075 – 0.19 NTU                                        | -                                           |
| 2,4-D                         | 70 ppb                       | ND                                                      | -                                           |
| Aluminum                      | 200 ppb                      | ND – 175 ppb                                            | 0 ppb                                       |
| Ammonium nitrogen             | -                            | -                                                       | 0.37 – 1.34 ppm                             |
| Antimony                      | 6 ppb                        | ND                                                      | -                                           |
| Arsenic                       | 10 ppb                       | ND – 1.9 ppb                                            | -                                           |
| Atrazine                      | 3 ppb                        | ND- 1.8 ppb                                             | -                                           |
| Barium                        | 2 ppm                        | 0.037 – 0.29 ppm                                        | -                                           |
| Benzo[a]pyrene                | 0 ppb                        | ND                                                      | -                                           |
| Bromide                       | 0.5 ppm                      | N/A                                                     | 0.32 – 0.46 ppm                             |
| Chloride                      | 250 ppm                      | 25 – 139 ppm                                            | 65.6 – 101.9 ppm                            |
| Chromium                      | 100 ppb                      | ND – 3.2 ppm                                            | -                                           |
| Copper                        | 1.3 ppm health-based limit   | 0.27 (90 <sup>th</sup> percentile) – 0.43 ppm           | 0 – 2.7 ppm                                 |
| Fluoride                      | 4 ppm                        | 0.24 – 1.2 ppm                                          | 0.68 – 0.83 ppm                             |
| Haloacetic acids (HAA5)       | -                            | 8.9 – 90 ppb                                            | -                                           |
| Iron                          | 0.3 ppm                      | ND – 0.21 ppm                                           | 0 – 0.038 ppm                               |
| Lead                          | 15 ppb for corrosion control | 8.2 (90 <sup>th</sup> percentile) – 36 ppb              | 0 – 40.9 ppb                                |
| Manganese                     | 0.05 ppm                     | ND                                                      | 0 – 0.00176 ppm                             |
| Nitrate                       | 10 ppm                       | ND – 4.8 ppm                                            | 0.82 – 2.78 ppm                             |
| Nitrite                       | 3 ppm                        | N/A                                                     | ND – 0.06 ppm                               |
| Nickel                        | -                            | ND – 2.3 ppb                                            | 0 – 3.18 ppb                                |
| Phosphate                     | -                            | N/A                                                     | ND – 0.04 ppm                               |
| Potassium                     | -                            | N/A                                                     | 0.68 – 3.69 ppm                             |
| Simazine                      | 4 ppb                        | ND – 1.2 ppb                                            | -                                           |
| Sodium                        | -                            | 14 – 86 ppm                                             | 0 – 65.92 ppm                               |
| Sulfate                       | 250 ppm                      | 8.8 – 165 ppm                                           | 44.61 – 63.03 ppm                           |
| Toluene                       | 1,000 ppb                    | ND – 1.5 ppb                                            | -                                           |
| Total Xylenes                 | 10,000 ppb                   | ND                                                      | -                                           |
| Total Trihalomethanes (TTHMs) | 80 ppb                       | 18 – 82 ppb                                             | 13.65 – 26.86 ppb                           |

**Table SI-2. 2018 Total water use at the school campus**

| Month        | Total Gallons/Month | Gallons per day   |
|--------------|---------------------|-------------------|
| Jan          | 0                   | 0                 |
| Feb          | 29,174,028          | 1,458,701         |
| Mar          | 33,942,859.5        | 1,697,143         |
| Apr          | 44,434,288.8        | 2,221,714         |
| May          | 123,709,100         | 6,185,455         |
| Jun          | 158,493,518         | 7,924,676         |
| Jul          | 80,621,304.3        | 4,031,065         |
| Aug          | 364,843,662         | 18,242,183        |
| Sept         | 364,114,311         | 18,205,716        |
| Oct          | 44,378,184.9        | 2,218,909         |
| Nov          | 64,238,965.5        | 3,211,948         |
| Dec          | 51,278,964.6        | 2,563,948         |
| <i>Total</i> | <i>44,434,288.8</i> | <i>67,961,459</i> |

School water use (GPD) was calculated with assumption of 20 days of water use per month.

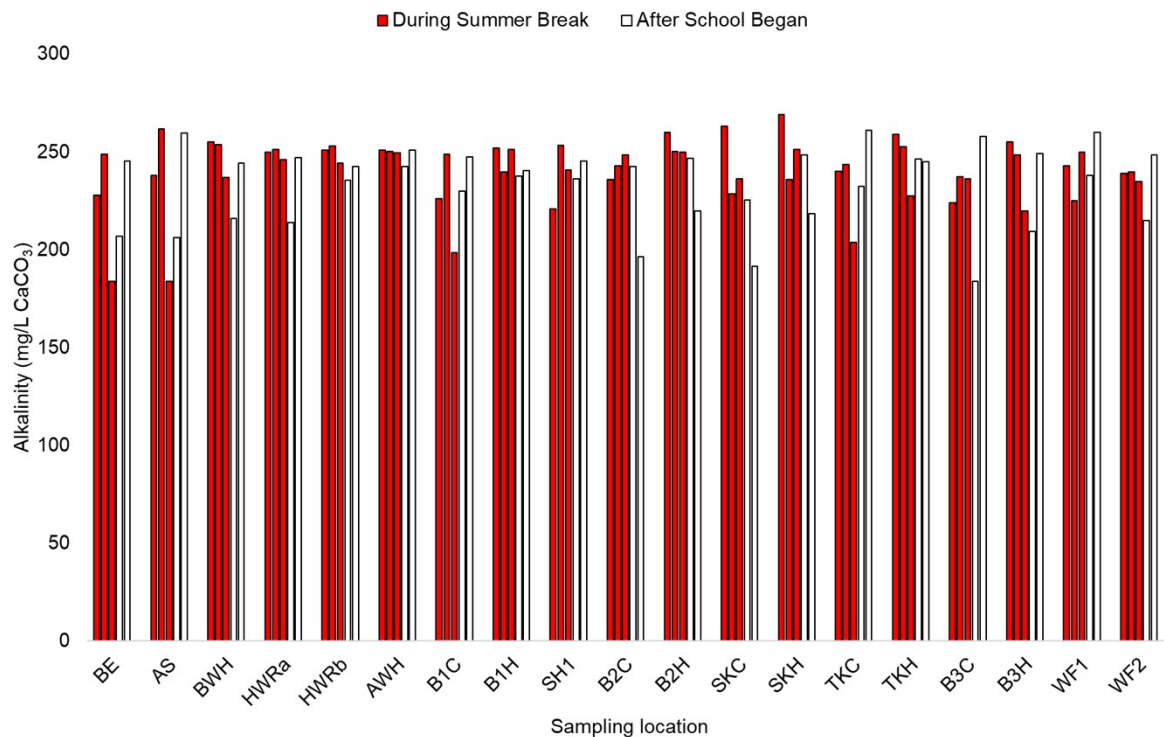

**Figure SI-3. Alkalinity concentration as CaCO<sub>3</sub> at routine sampling locations**

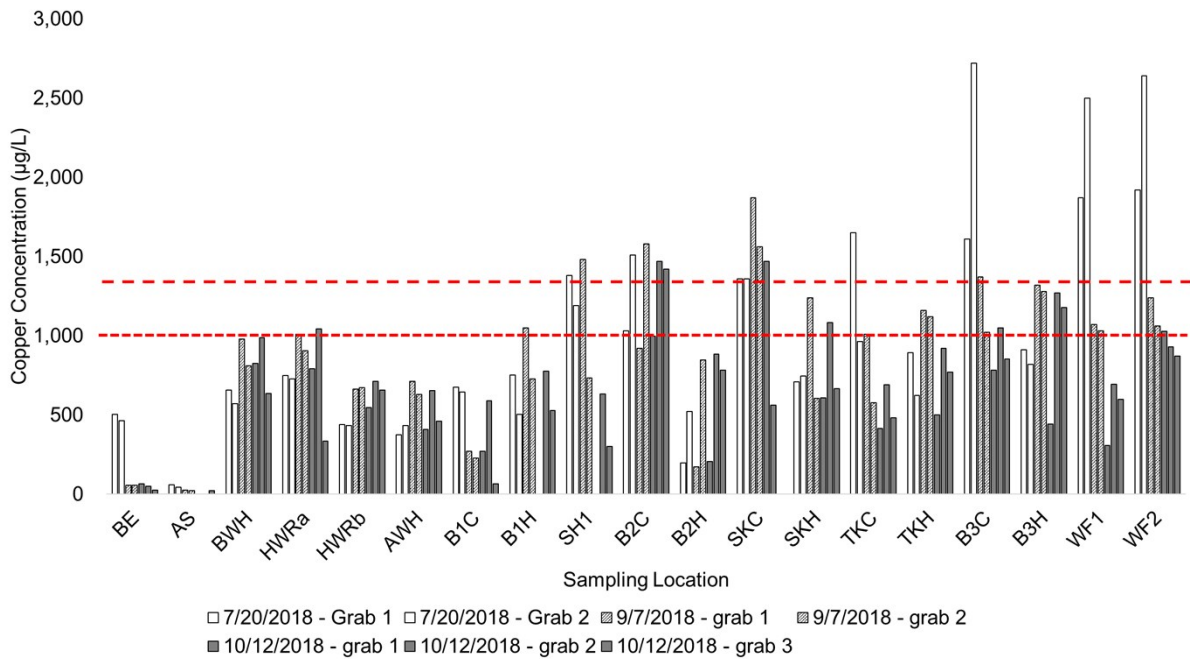

**Figure SI-4. Copper concentration of multiple grabs from routine sampling locations.**  
 The 1.0 mg/L SMCL and 1.3 mg/L MCL are shown.

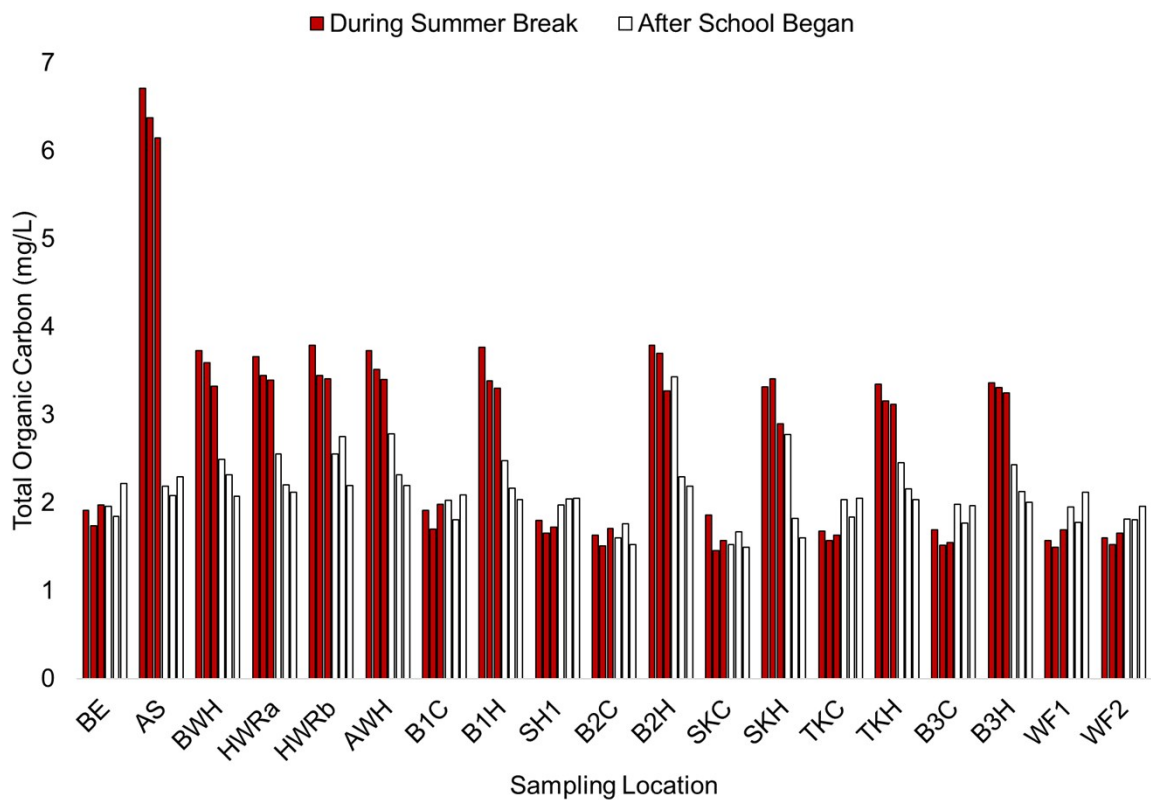

**Figure SI-5. Total organic carbon concentration of first draw water samples**



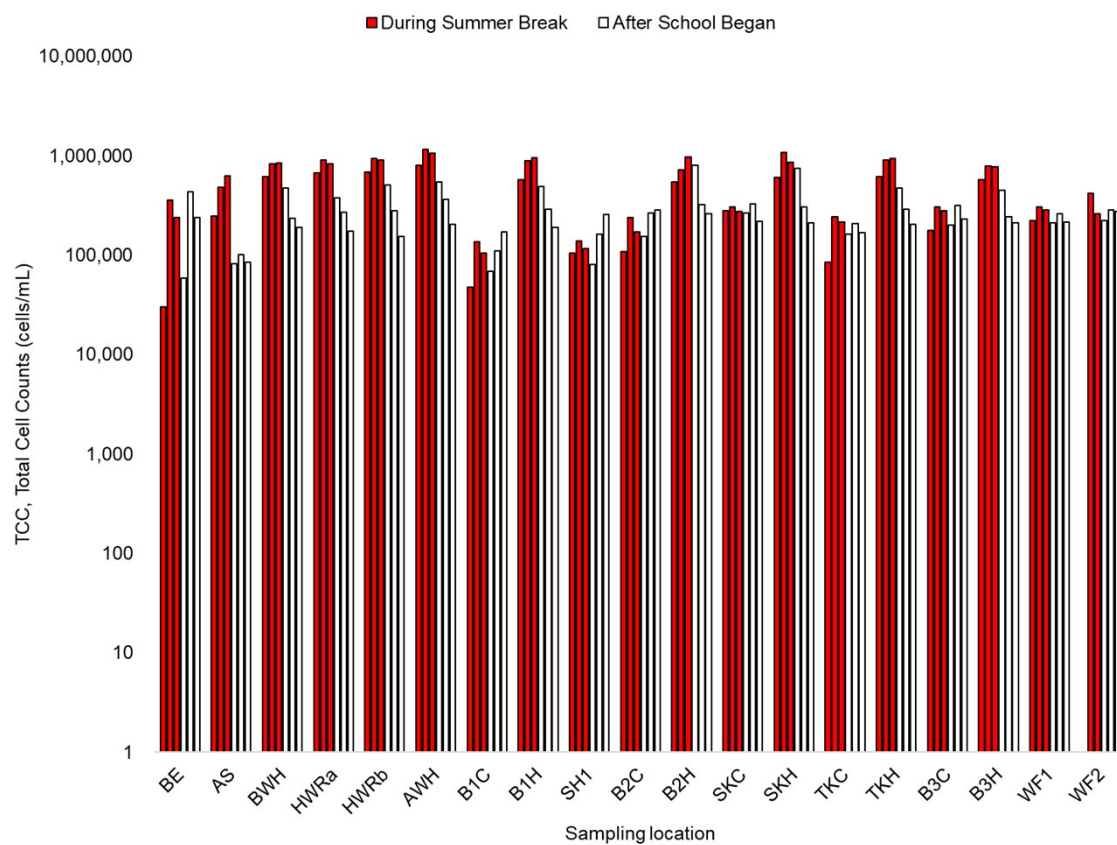

**Figure SI-6. Total cell count concentration at routine sampling locations**

**Table SI-3. Water quality test results for water sampling outside the school campus**

| Location | Temp<br>(°C) | pH   | DO<br>(mg/L) | Total Cl <sub>2</sub><br>(mg/L) | Free Cl <sub>2</sub><br>(mg/L) | NH <sub>2</sub> Cl<br>(mg/L) | NH <sub>3</sub> -N<br>(mg/L) | Copper<br>(µg/L) |
|----------|--------------|------|--------------|---------------------------------|--------------------------------|------------------------------|------------------------------|------------------|
| 1        | 27.3         | 7.85 | 7.95         | 0.57                            | 0.52                           | 1.39                         | 0.12                         | 91.4             |
| 2        | 25.1         | 7.8  | 7.62         | 0.54                            | 0.45                           | 1.16                         | 0.14                         | 137              |
| 3        | 25.8         | 7.86 | 7.91         | 0.44                            | 0.39                           | 0.97                         | 0.16                         | 76.9             |
| 4        | 30.7         | 7.75 | 7.24         | 0.61                            | 0.51                           | 1.33                         | 0.14                         | 26.1             |
| 5        | 25.7         | 7.88 | 7.94         | 0.25                            | 0.2                            | 0.56                         | 0.18                         | 163              |
| 6        | 23.7         | 7.77 | 7.44         | 0.58                            | 0.52                           | 1.29                         | 0.17                         | 69.6             |
| 7        | 28.2         | 7.77 | 7.75         | 0.28                            | 0.26                           | 0.12                         | 0.15                         | 764              |
| 8        | 26.1         | 7.68 | 7.69         | 0.44                            | 0.33                           | 1.05                         | 0.16                         | 46.9             |
| 9        | 27.4         | 7.56 | 7.03         | 0.05                            | 0.03                           | 0.09                         | 0.17                         | 1,140            |
| 10       | 25.6         | 7.87 | 8.46         | 0.54                            | 0.5                            | 1.3                          | 0.14                         | 149              |
| 11       | 30.6         | 7.78 | 7.41         | 0.3                             | 0.28                           | 0.68                         | 0.1                          | 89.6             |
| 12       | 26.8         | 7.81 | 8.2          | 0.67                            | 0.61                           | 1.53                         | 0.07                         | 17.1             |
| 13       | 22.8         | 7.76 | 7.64         | 0.14                            | 0.11                           | 0.27                         | 0.08                         | 861              |
| 14       | 23.1         | 7.56 | 8.22         | 0.03                            | 0.02                           | 0.08                         | 0.03                         | 147              |
| 15       | 20.8         | 7.84 | 8.08         | 0.04                            | 0.01                           | 0                            | 0.17                         | 1,620            |
| 16       | 26.9         | 7.86 | 8.38         | 0.54                            | 0.49                           | 1.31                         | 0.11                         | 46.9             |
| 17       | 27.4         | 7.77 | 7.85         | 0.22                            | 0.2                            | 0.45                         | 0.19                         | 548              |
| 18       | 27.7         | 7.7  | 7.81         | 0.32                            | 0.26                           | 0.78                         | 0.16                         | 232              |
| 19       | 18.9         | 7.75 | 8.03         | 0.03                            | 0.01                           | 0                            | 0.03                         | 1,590            |
| 20       | 27.3         | 7.73 | 7.51         | 0.04                            | 0.03                           | 0.1                          | 0.13                         | 725              |
| 21       | 16.2         | 7.6  | 3.63         | 0.04                            | 0.03                           | 0.01                         | 0.17                         | 999              |

## 2.1 Other Heavy Metals Found and Water Corrosivity

Other heavy metals associated with metal plumbing component corrosion were detected throughout the building but below MCL and SMCLs (**TABLE SI-4**). Nickel and zinc were found at a much greater concentration outside the utility room (max. 20.4 µg/L for nickel, max. 1,180 µg/L for zinc) compared to inside the utility room (0 to 3.2 µg/L for nickel, 7.9 to 177 µg/L for zinc). Lead was only detected at the shower head location (3 of 6 first grab samples), and all first three grabs exceeded the action level of 15 µg/L (**Table 2**). Corrosivity estimated using school water quality data does not seem helpful to predict none of copper or lead leaching. Although hot water was predicted to be slightly more corrosive than other cold locations (Langelier Index from -0.56 to -0.05), more aggressively corrosive locations did not always have high heavy metal concentrations.

**Table SI-4. Other heavy metal water sampling results from the school**

| Heavy metal | MCL and SMCL (mg/L) | School water entering point (mg/L) | School sampling range in cold (mg/L) | School sampling range in hot (µg/L) |
|-------------|---------------------|------------------------------------|--------------------------------------|-------------------------------------|
| Aluminum    | 0.05, 0.2           | 0                                  | 0 – 0.087                            | 0 – 0.039                           |
| Copper      | 1.3, 1.0            | 0.026 – 0.50                       | 0 – 2.72                             | 0 – 1.32                            |
| Iron        | 10, 0.3             | 0 – 0.0104                         | 0 – 0.062                            | 0 – 0.026                           |
| Manganese   | 0.05                | 0 – 0.00112                        | 0 – 0.0052                           | 0 – 0.0011                          |
| Nickel      | 0.1                 | 0 – 0.0032                         | 0 – 0.056                            | 0 – 0.093                           |
| Lead        | 0.0015, 0           | 0                                  | 0 – 0.041                            | 0                                   |
| Zinc        | 5                   | 0 – 0.18                           | 0 – 11.8                             | 0 – 10.2                            |

## 2.2 Other Contaminants

No specific trend or statistically significant found for TTHM, but the biggest difference found in the utility room. TTHM was similar for all six visits for the water entering the building but decreased after softener (**Figure SI-7**). TTHM levels entering the building were 13.6 to 26.4 µg/L while the water supplier reported a water distribution system annual average TTHM concentration of 18 to 82 µg/L (Citizens Energy Group, 2018) (**Table 2**). Other organic (TTHM) and inorganic contaminants were also found entering the building but within levels reported by the water supplier (Al, Cl-, Cr, F-, Fe, Mn, Na, Ni, Zn, NO<sub>3</sub>-, NO<sub>2</sub>-, SO<sub>4</sub>-2, hardness) (**Table SI-1**). Distance from the entry point to location was correlated with TTHM concentration ( $p=0.03$ ), but no difference between before and after students returned to school. None of the locations exceeded the TTHM limit of 80 µg/L (EPA, 2002).

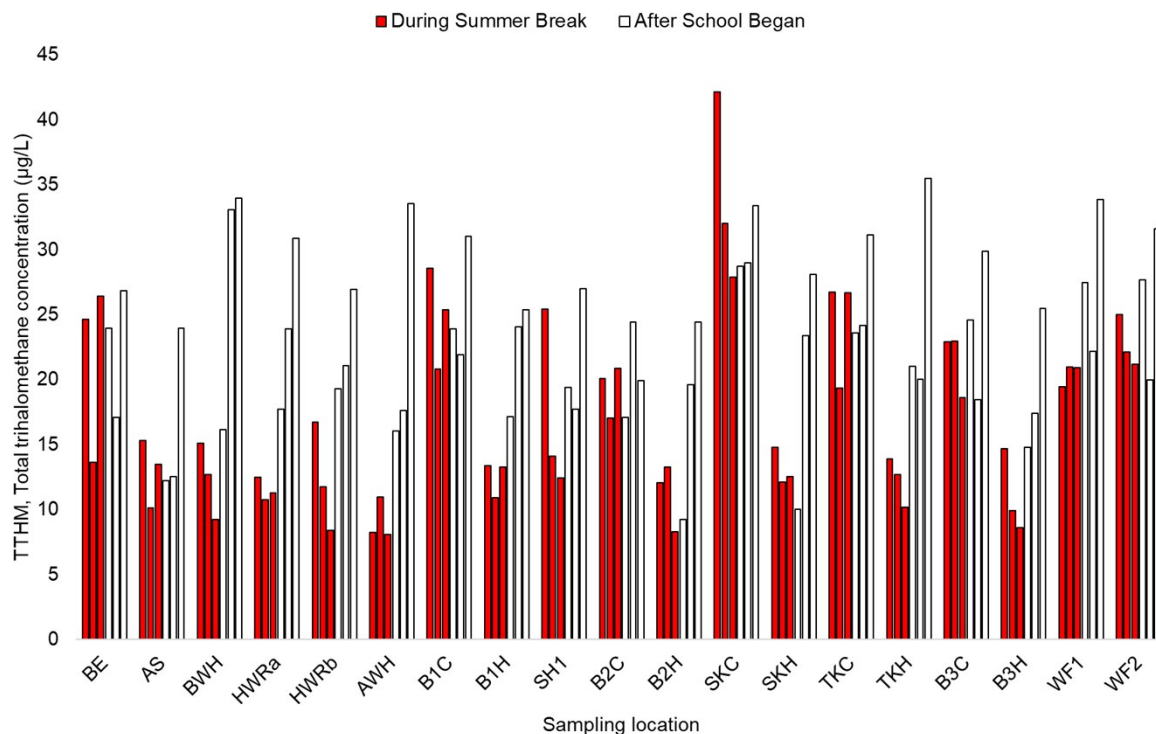

## Figure SI-7. Total trihalomethane concentration at routine water sampling locations

### 2.3 Water Temperature Monitoring

Hot water recirculation lines should be prevented from getting below 55°C but 60°C line returned at 48°C and the other lines returned at 35°C (according to in-line sensors). Because authors concerned about some locations may not get the hot water, temperature monitoring at 3 distal fixtures was conducted for 5 minutes (**Figure SI-8, Table SI-5**). No location reached the hot water recirculation line temperature threshold (48.8°C). SKH had shorter distance from BE increased temperature much faster, but still did not reach the threshold. B3H had longest distance from BE never reached above 28°C within 5 minutes. Although only three locations were monitored for temperature, a possible problem that may have with the recirculation system with large dead ends in certain parts of the school was noticed. This may mean that many locations do not reach certain temperature that are in a perfect temperature zone for microbial growth.

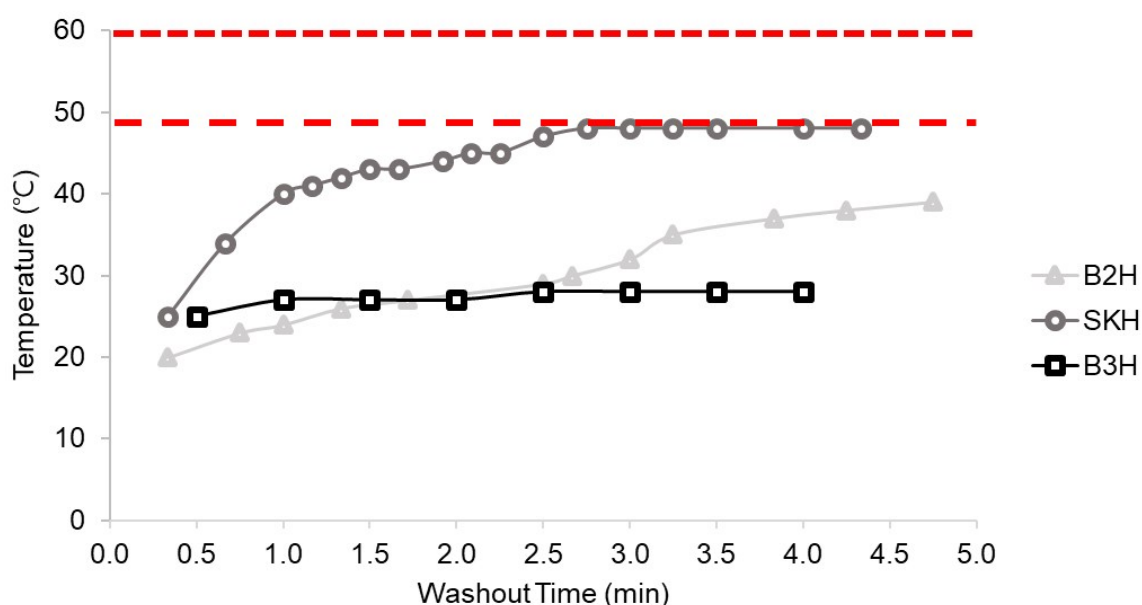

**Figure SI-8. Temperature washout curves for hot water.** Red lines are the temperature threshold (60°C and 48.8°C) that are supposed to be achieved based on the water heating equipment set points.

**Table SI-5. Estimated delivery and return pipe length for the water temperature monitoring**

| <b>Water deliver</b> | <b>Delivery length</b> | <b>Water returns</b> | <b>Return length</b> | <b>Total length</b> |
|----------------------|------------------------|----------------------|----------------------|---------------------|
| BE to B3H            | 509.97 ft              | B3H to HWRC          | 496.75 ft            | 1006.72 ft          |
| BE to B2H            | 252.002 ft             | B2H to HWRC          | 215.49 ft            | 467.492 ft          |
| BE to SKH            | 267.75 ft              | SKH to HWRC          | 282.3 ft             | 550.05 ft           |
